# Supplementary material for: Efficient narrow-band green phosphors for mini-LED displays using dual strategies of high concentration quenching and energy transfer
Source: Royal Society of Chemistry journal article supplement (doi:10.1039/d4tc04253k), 2024-11-27
Supplement: d4tc04253k1.pdf [file d4tc04253k1.pdf]

## Supporting Information

### Efficient Narrow-band Green Phosphor for Mini-LED Displays Using Dual Strategies of High Concentration Quenching and Energy Transfer

**Runtian Kang, Takatoshi Seto\*, Yuhua Wang\***

National & local Joint Engineering Laboratory for Optical Conversion Materials and  
Technology,

School of Physical Science and Technology, Lanzhou University, Lanzhou, 730000,  
China.

\* Corresponding author: Takatoshi Seto, Ph. D, Professor. Yuhua Wang, Ph. D,  
Professor.

E-mail: seto@lzu.edu.cn; wyh@lzu.edu.cn

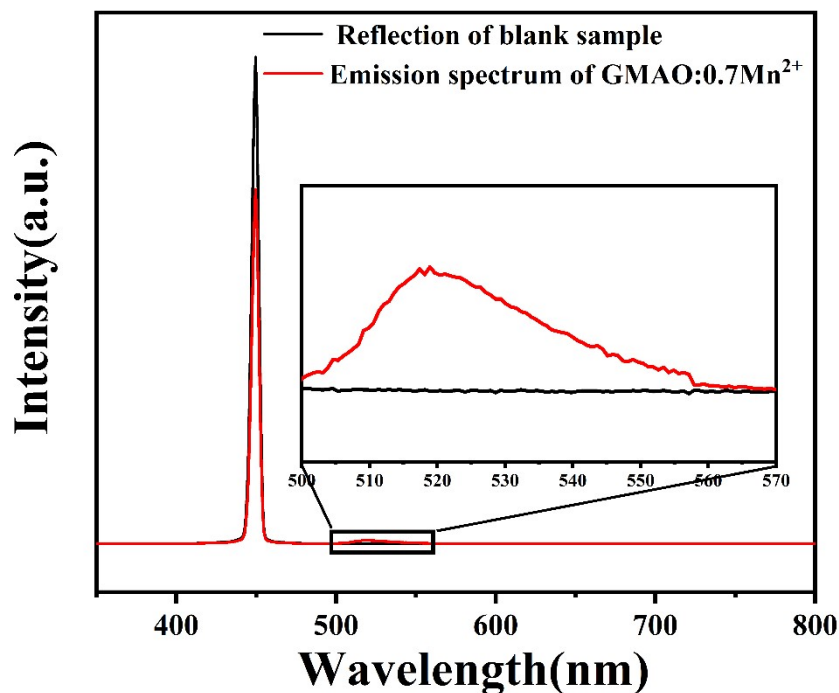

Figure S1. The quantum efficiency measurement spectrum of GMAO:0.7Mn<sup>2+</sup>.

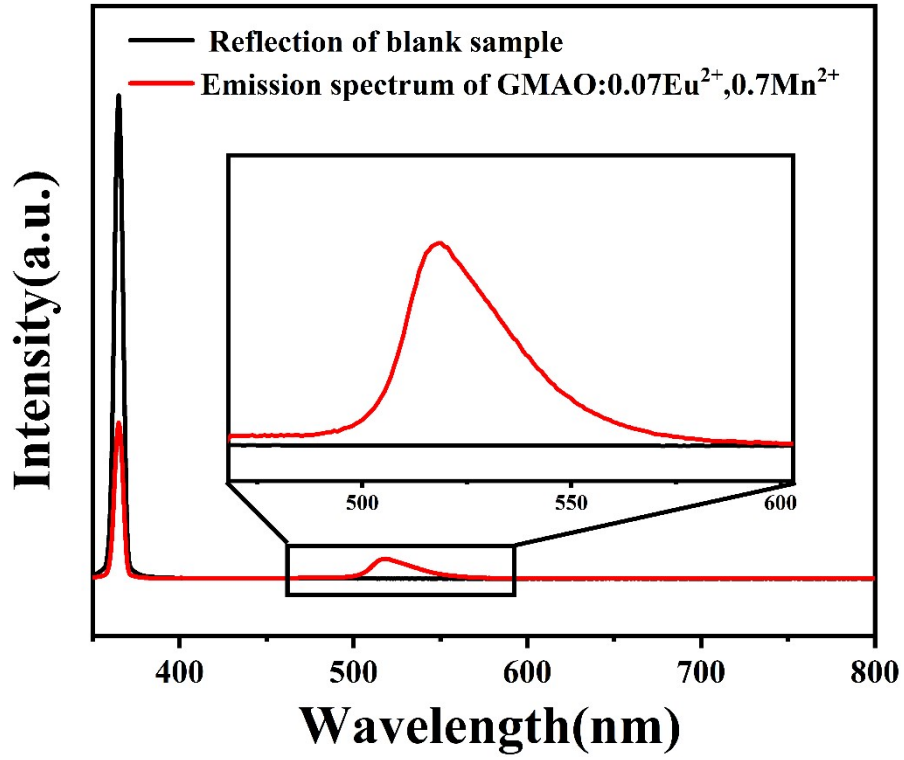

Figure S2. The quantum efficiency measurement spectrum of GMAO: 0.07Eu<sup>2+</sup>,0.7Mn<sup>2+</sup>.

Calculation S1 Blasses equation

$$R_C = 2 \left( \frac{2}{4} \frac{V}{\pi N_z} \right)^{\frac{1}{3}} \#$$

Where C is the total concentration of Eu<sup>2+</sup> and Mn<sup>2+</sup>, V is the volume of the unit cell, and N<sub>z</sub> is the number of available sites for the dopant in the unit cell. For GMAO: 0.07Eu<sup>2+</sup>, 0.7Mn<sup>2+</sup>, V = 583.83 Å<sup>3</sup>, C = 0.77, N<sub>z</sub> = 2.

Calculation S2 Average lifetime (τ)

$$\tau = \frac{(A_1 \tau_1^2 + A_2 \tau_2^2)}{(A_1 \tau_1 + A_2 \tau_2)}$$

Where t and I are time (ns) and luminous intensity respectively, and A<sub>1</sub>, A<sub>2</sub>, and

$\tau_1, \tau_2$  are exponential components of constant and lifetime.

Calculation S3 Energy transfer efficiency ( $\eta_T$ )

$$\eta_T = 1 - \frac{\tau_S}{\tau_{S0}}$$

Where  $\tau_{so}$  is the lifetime of  $\text{Eu}^{2+}$  when undoped with  $\text{Mn}^{2+}$  and  $\tau$  is the lifetime of  $\text{Eu}^{2+}$  when doped with  $\text{Mn}^{2+}$ .

Calculation S4 Activation energy ( $\Delta E$ )

$$\ln \left( \frac{I_0}{I} - 1 \right) = \ln A - \frac{\Delta E}{KT}$$

In this equation,  $I_0$  and  $I$  are the initial emission intensity and the integral emission intensity with temperature change, respectively.  $\Delta E$  is the activation energy,  $a$  is the constant, and  $K$  is the Boltzmann constant ( $8.62 \times 10^{-5} \text{eV/K}$ ).
